# Supplementary material for: Multiple conjugate observations of magnetospheric fast flow bursts using THEMIS observations
Source: Copernicus journal article supplement (doi:10.5194/angeo-40-531-2022), 2022-08-05
Supplement: Supplementary file 1 [file angeo-40-531-2022-supplement.zip]

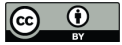

## *Supplement of*

# **Multiple conjugate observations of magnetospheric fast flow bursts using THEMIS observations**

**Homayon Aryan et al.**

*Correspondence to:* Homayon Aryan (aryan.homayon@gmail.com)

- [angeo-40-531-2022-supplement-title-page.pdf](#)
- [Case2\\_Video.mov](#)
- [Case3.png](#)
- [Case3\\_Video.mov](#)
- [Case4.png](#)
- [Case5.png](#)
- [Case5\\_Video.mov](#)
- [Case6.png](#)
- [Case6\\_Video.mov](#)

The copyright of individual parts of the supplement might differ from the article licence.
